# Supplementary material
Source: Research Square preprint supplement (doi:10.21203/rs.3.rs-9889005/v1)
Supplement: Supplementary file 1 [file e47f789791db58494ff2491e.xlsx]

## Sheet: Site 1
	E	VN	LN	VIL	VL	LA	TBM	TRY	HI	ARD	MRY	UNMRY	ARW	DPM
1	92.5	4.35	60.9333	13	3.77	141.57	13.77	46.52	85.07	76	40.33	6.19	0.74	113
2	92	4.31667	60.2	13.2	3.71	140.13	12	46.875	79.33	75.5	40.98	5.9	0.73	113
3	91.5	4.34	67.5333	13.75	3.72	148.66	12.11	46.81	86.46	74.25	40.5	6.31	0.72	113.5
4	91	3.81667	55.7333	13.95	3.14	81.74	8.55	44.63	70.6	63.6	41.86	2.77	0.61	116
5	90.5	3.92	50.0667	11.2	2.76333	107.78	9	45.48	73.93	63	40.22	5.26	0.64	114
6	90	3.72	43.6	14.38	2.58333	106.35	10.25	44.76	72.93	65	41.45	3.31	0.63	115
7	93.75	3.48333	49.4667	14.76	3.17	121.65	10.3	30.77	75.04	71	29.3	1.47	0.42	117
8	83	3.58	53.2	15.23	4.37	120.77	9.5	42.06	74.71	69	38.56	3.5	0.41	119
9	92.5	3.45	66	16.33	4.19	120.87	8.8	38.36	73.9	70	37.5	0.86	0.51	121
10	91	4.21667	39.8667	11.83	2.66	109.88	16.1	33.57	85.5	54	30.77	2.8	0.52	121
11	89	3.48333	53.2667	11.74	2.49	109.98	10.3	34.45	81	68	30.33	4.12	0.53	120.5
12	90	4.28333	49.3333	12.03	2.62	112.78	11.2	33.67	63.73	69	30.76	4.91	0.7	120
13	82	4.35	45.2667	12.27	2.43667	128.67	12.6	41.38	64.13	75.6	38.56	1.17	0.72	121
14	88.5	4.01667	37	12.39	2.25667	131.78	11.7	31.18	71.72	62	30.01	1.17	0.7	122.5
15	84.75	4.21667	64.2667	12.9333	3.87667	131.89	10.8	41.63	76.73	72	39.98	1.65	0.63	121
16	89	3.75	42.0667	12.9	3.255	102.67	10.3	43.5	79.56	57	40.7	2.8	0.62	124
17	90.5	3.41667	51.8	12.8333	3.55	104.05	10.9	43.08	76.08	67	40.9	4.18	0.61	123.5
18	86	3.81667	61.1333	12.9333	3.46	101.55	12.3	43.54	76.14	67.5	41.5	2.04	0.62	124
19	81	4.15	61.8	12.8667	3.38	129.25	9.4	34.57	70.19	61.2	32.57	2	0.63	125
20	82.25	3.75	48.5333	13.0333	3.33	134.33	9.48	44.83	70.21	59	43.56	1.27	0.74	124
21	81.75	5.21667	73.9333	14.22	3.28	156.77	8.6	44.43	69.81	58.5	42.45	1.98	0.73	124
22	88	5.21667	74.3333	13.87	3.33	116.5	7.7	45.63	67.03	65.6	42.67	2.96	0.52	125.5
23	87	5.55	85.1333	14.33	3.83	97.34	7.8	35.48	67.24	67.5	34.45	1.08	0.63	126
24	89.33	4.55	66.0667	13.7	3.42333	100.44	8.3	45.76	68.95	69.2	42.33	3.43	0.66	125

## Sheet: Site 2
		EM%	VN	LN	VIL	VL	LA	TBM	TRY	HI	ARD	MRY	UN MRY	ARW	DPM
1		81.5	5.13333	52.9333	12.5	2.37	133.57	10.77	23.57	61.73	72	23.57	1.07	0.63	110
2		82	4.06667	53.2	12.8	2.51	133.13	10	23.83	61.13	72.5	23.83	1.03	0.62	111
3		82.5	4	61.5333	13.45	2.72	142.66	11.11	24.43	67.72	72.25	24.43	1.53	0.62	111.5
4		83	3.26667	50.7333	13.75	2.34	76.74	7.55	24.63	67.6	62.6	24.63	1.63	0.55	113
5		83.5	3.6	46.0667	11.1	2.16333	103.78	7	25.48	71.93	61	25.48	2.38	0.24	112
6		84	2.86667	40.6	14.28	2.18333	103.35	7.25	24.76	70.93	62	24.76	1.56	0.54	114
7		88.75	2.93333	47.4667	14.56	2.97	119.65	7.3	26.52	72.04	67	26.52	3.02	0.45	115
8		89	3.53333	52.2	14.93	2.97	119.77	7.5	26.875	70.71	66	26.875	3.08	0.46	116
9		89.5	4.2	65	15.93	2.99	119.87	7.8	26.81	68.9	68	26.81	2.81	0.47	117
10		89	3.66667	37.8667	9.33	1.66	107.88	15.1	30.77	79.5	53	30.77	6.47	0.65	118
11		88	2.93333	50.2667	11.14	1.69	106.98	8.3	32.06	81	66	32.06	7.56	0.65	118.5
12		89	3.73333	45.3333	11.33	2.02	108.78	8.2	28.36	79.07	66	28.36	3.76	0.65	119
13		90	3.8	40.2667	11.47	2.03667	123.67	8.6	21.38	79.33	71.6	21.38	0.68	0.54	119
14		95.5	3.46667	31	11.59	2.05667	125.78	8.7	21.18	82.46	69	21.18	0.58	0.55	119.5
15		90.75	3.66667	56.2667	12.2333	2.07667	124.89	8.8	21.63	71.73	70	21.63	0.73	0.56	120
16		94	3.2	35.0667	12.3	1.655	94.67	9.3	23.5	73.56	56	23.5	1.5	0.34	121
17		94.5	2.86667	45.8	12.3333	2.15	97.05	9.9	23.08	71.08	65	23.08	1.08	0.45	121.5
18		95	3.26667	56.1333	12.5333	2.26	95.55	10.3	23.54	72.14	64.5	23.54	1.14	0.44	121
19		79	3.6	57.8	12.5667	2.38	124.25	6.4	24.57	67.19	57.2	24.57	2.27	0.61	122
20		79.25	3.2	45.5333	12.8333	2.53	130.33	6.48	24.83	68.21	56	24.83	2.23	0.61	122
21		77.75	4.66667	71.9333	14.12	2.68	153.77	6.6	24.43	68.81	56.5	24.43	1.73	0.62	123
22		83	4.66667	73.3333	13.77	2.33	95.5	6.7	25.63	65.03	64.6	25.63	2.73	0.31	123.5
23		81	5	84.1333	14.13	2.83	96.34	6.8	25.48	64.24	65.5	25.48	2.48	0.41	123
24		82.33	4	64.0667	13.4	2.42333	96.44	6.3	25.76	64.95	66.2	25.76	2.66	0.42	123
